# Supplementary material for: Modeling positional effects of regulatory sequences with spline transformations increases prediction accuracy of deep neural networks
Source: PubMed Central journal article supplement (PMC5905632; doi:10.1093/bioinformatics/btx727), 2017-11-16
Supplement: btx727_supplementary_figures.pdf [file btx727_supplementary_figures.pdf]

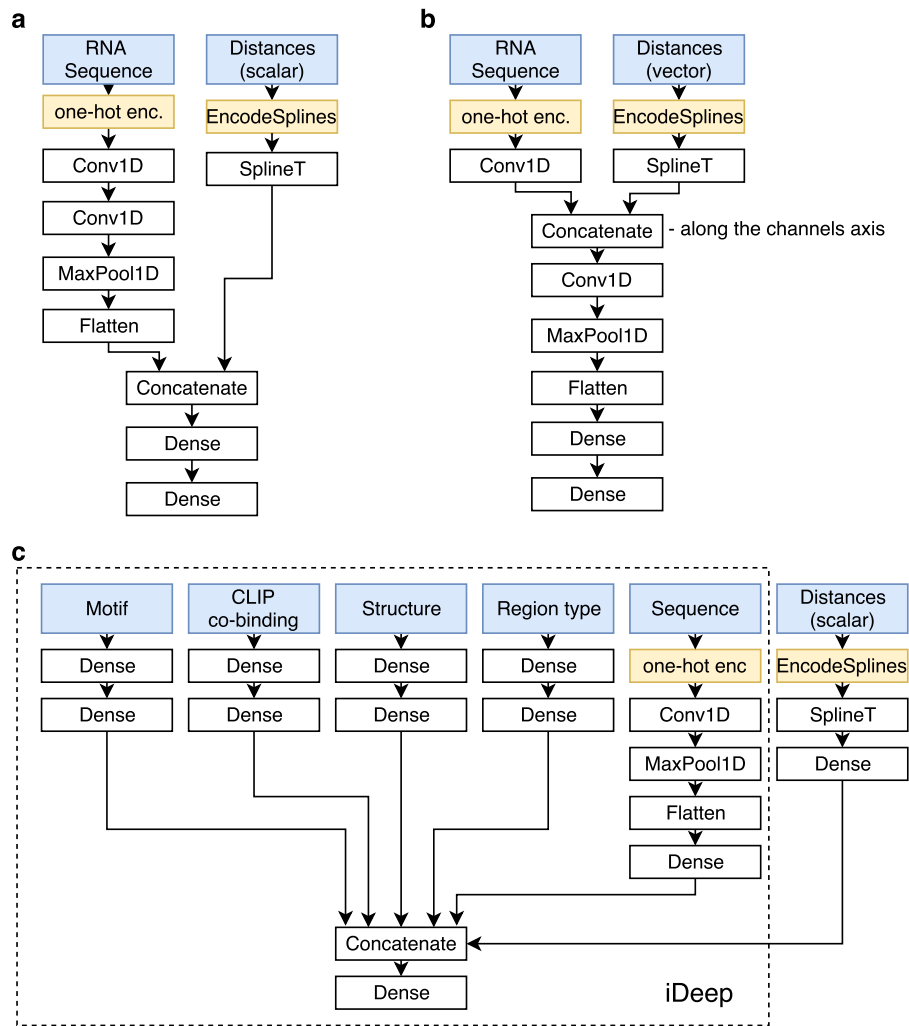

**Figure S1.** CLIP model architectures: **(a,b)** eCLIP models. They differ in the way distance is used. In **(a)**, only a single value (scalar) per input sequence is used. In **(b)** the distance is used as a vector along the sequence (one value per nucleotide). **(c)** iDeep model extended with spline transformation. Blue rectangles denote the input data modality, yellow rectangles denote the pre-processing function and white rectangles denote the neural-network layers using Keras notation. Batch normalization and dropout layers are not shown here but are specified in the Methods section.

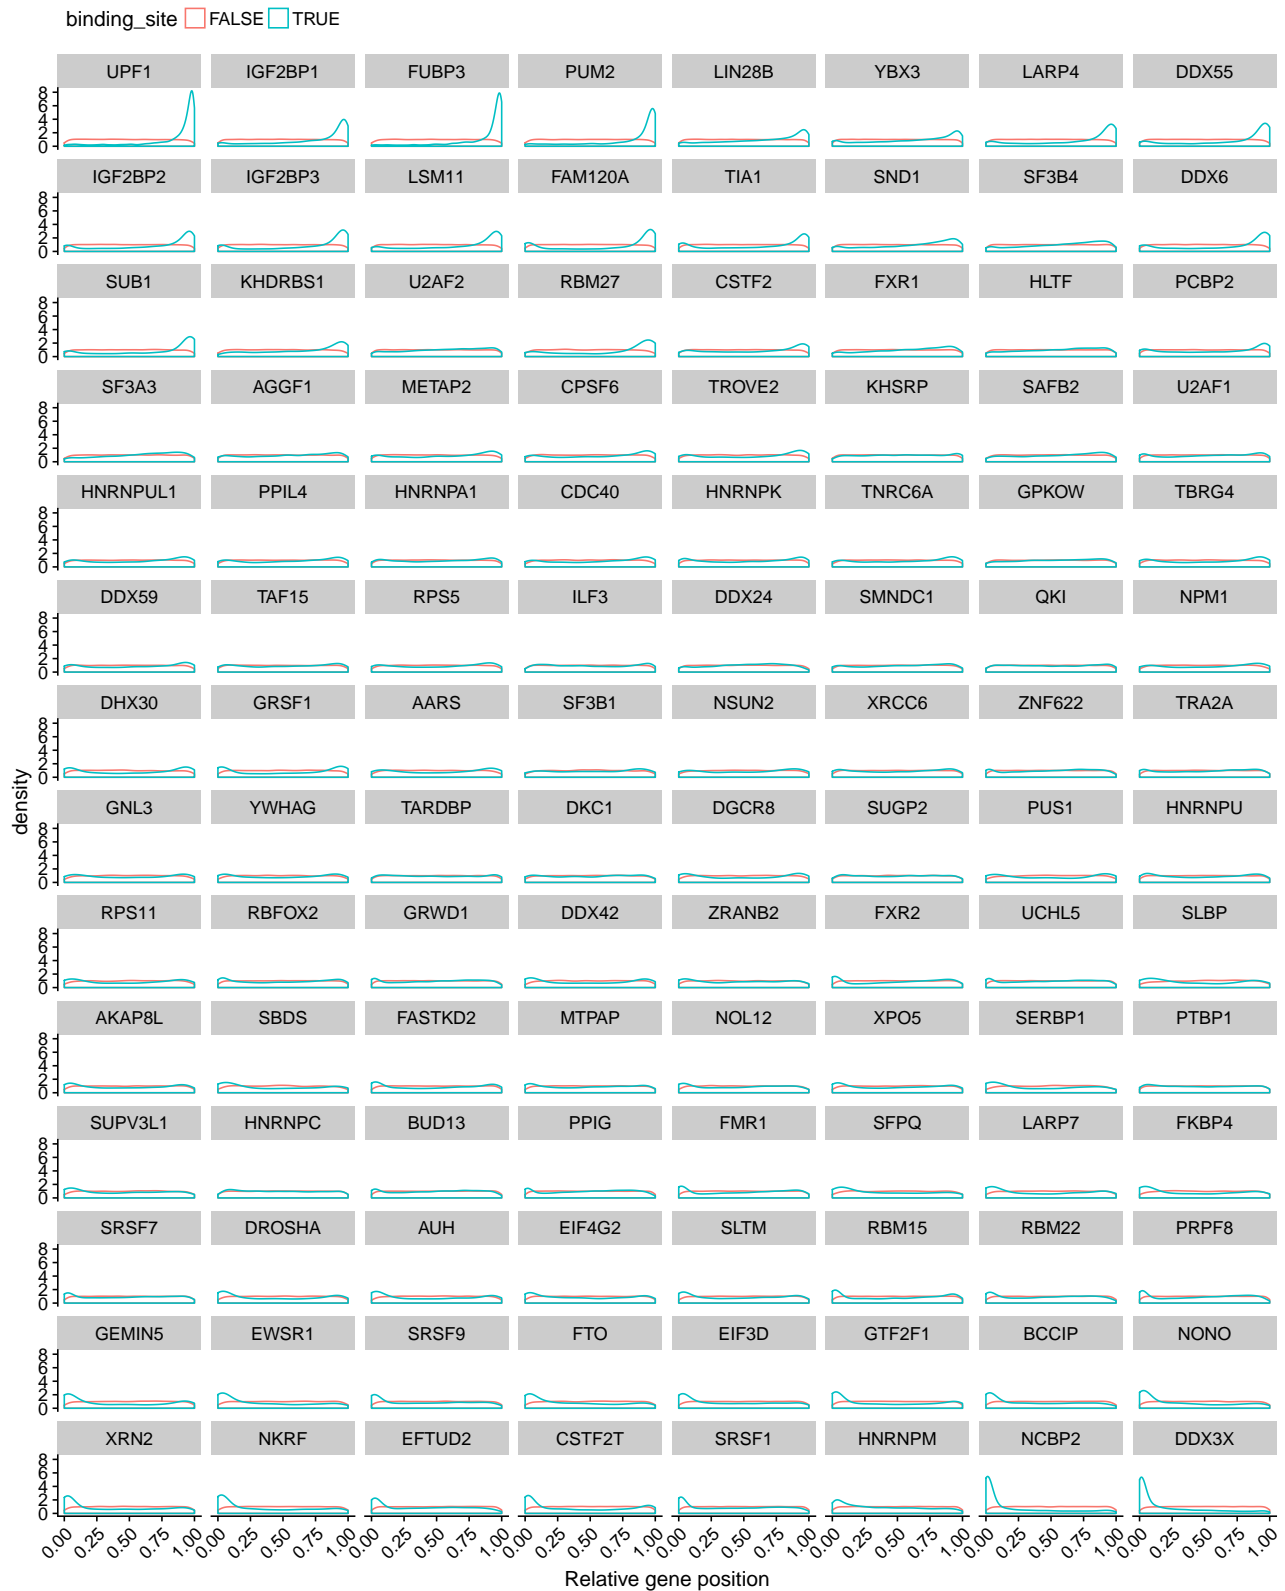

**Figure S2.** Relative genes positions for 112 RBPs measured by eCLIP. RBPs are sorted by the t-test statistic comparing relative genes positions of binding to non-binding sites.

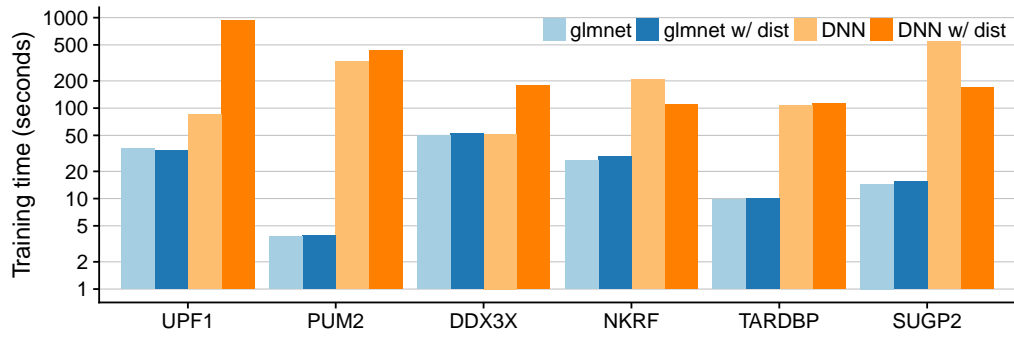

**Figure S3.** Training time of models shown in Figure 2b using 4 virtual threads of an Intel Core i7-6700 CPU.

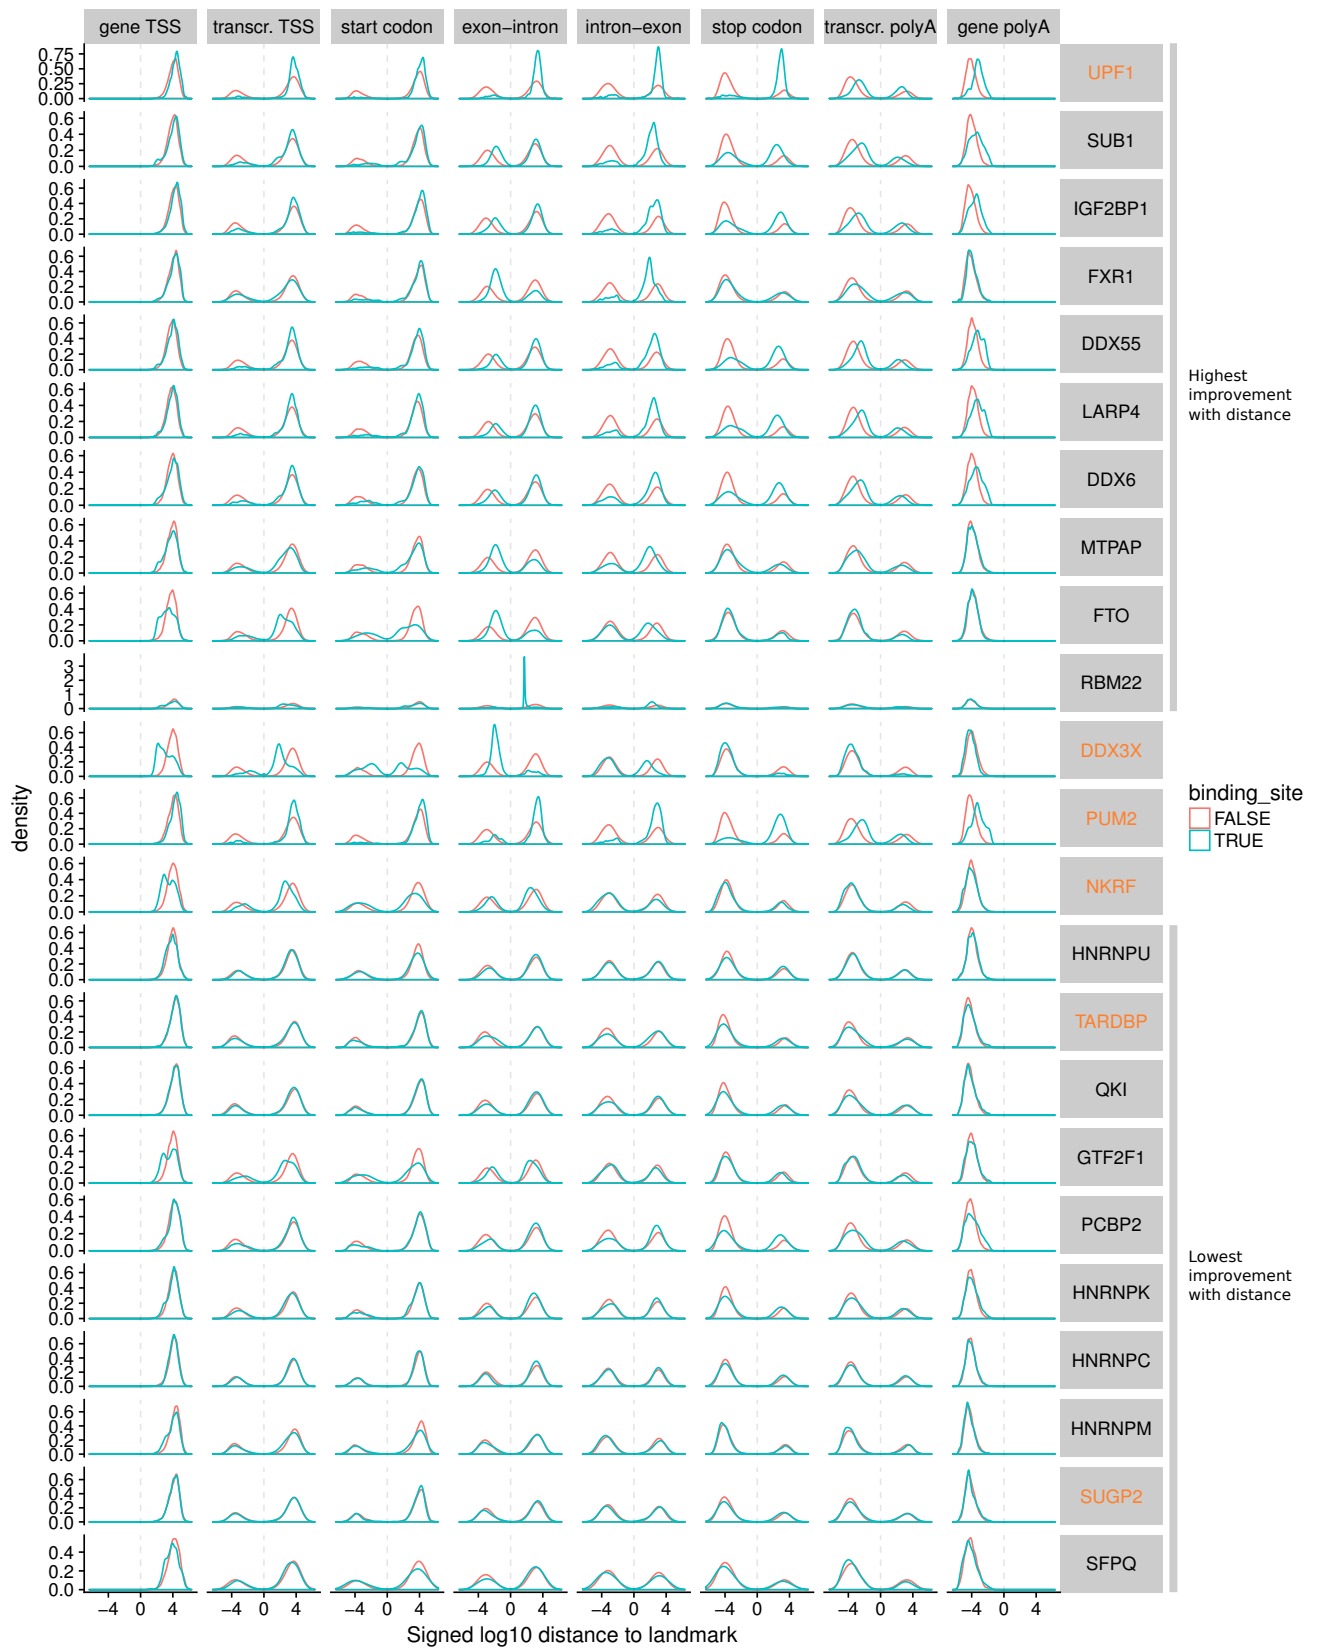

**Figure S4.** Relative distance to all 8 considered genomic landmarks for eCLIP peaks. Only RBPs labelled in Figure 2c are shown.

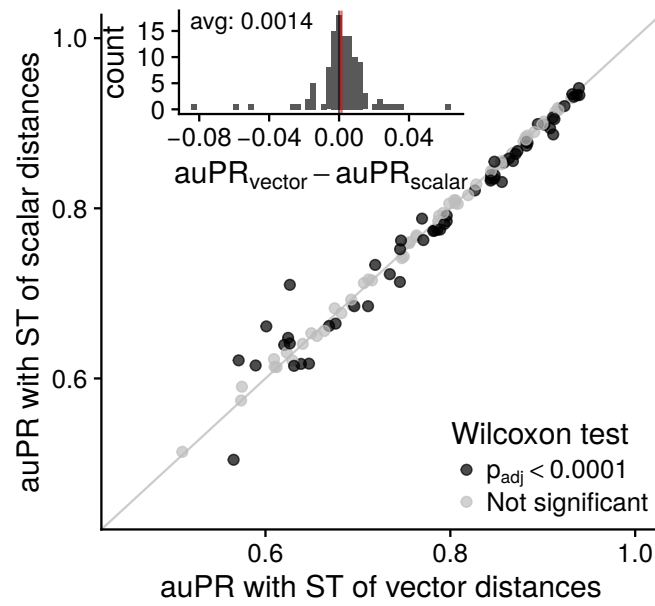

**Figure S5.** Test-accuracy (auPR) comparing two different variants of the eCLIP DNN w/ dist model: the main model using a single scalar per input sequence (y-axis, architecture shown in Figure S1a) and the alternative model using a vector of distances alongside the sequence (x-axis, architecture shown in Figure S1b). Black represents statistically significant difference ( $P < 0.0001$ , Wilcoxon test on 200 bootstrap samples, Bonferroni correction for multiple testing). Histogram within the scatterplot shows a distribution of performance differences and the average value.

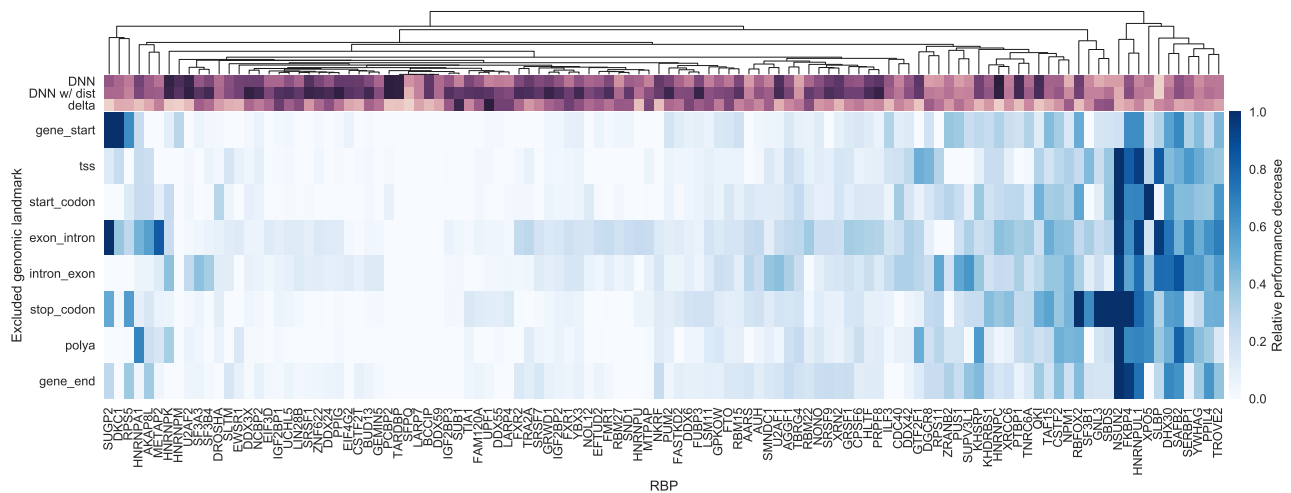

**Figure S6.** Relative test-accuracy (auPR) decrease when excluding individual features from the eCLIP DNN w/ dist model. A relative decrease of 1 means that the test-accuracy decreased to the accuracy of the sequence-only model (DNN) and a relative decrease of 0 means the test-accuracy remained unchanged (i.e. equals the DNN w/ dist model accuracy). Top rows in purple shows the auPR of the DNN, DNN w/ dist model and their difference. Darker red denotes a higher auPR. Relative decrease variations for the 11 rightmost RBPs should be interpreted with care since both the overall performance and the added value of including distance is low.

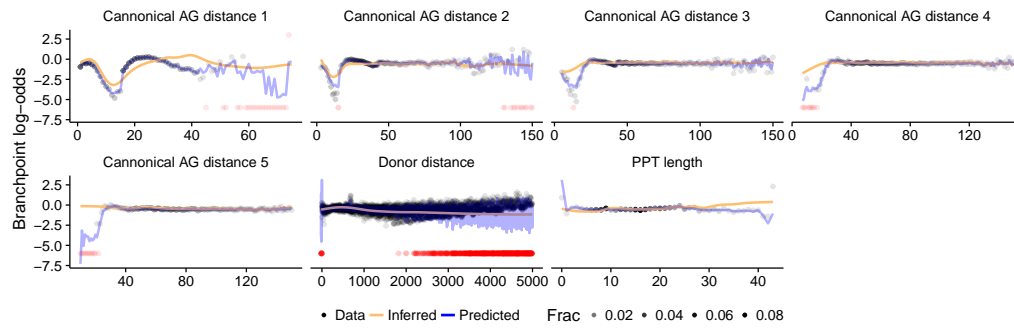

**Figure S7.** Fraction of branchpoints per position for the remaining seven features in log-odds scale (black dot, outlier shown in red) compared to the shallow NN model fit: inferred spline transformation (orange) and predicted fraction of branchpoint per position (blue).

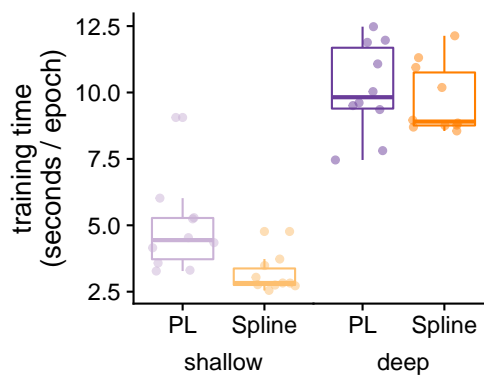

**Figure S8.** Training time per epoch of models shown in Figure 4e using 4 virtual threads of an Intel Core i7-6700 CPU.
